1 **Managing river fish biodiversity generates substantial economic benefits in four European countries**

2

3

4 Carsten Riepe <sup>a \*</sup>

5 Jürgen Meyerhoff <sup>b</sup>

6 Marie Fujitani <sup>a, c</sup>

7 Øystein Aas <sup>d</sup>

8 Johannes Radinger <sup>a, e</sup>

9 Sophia Kochalski <sup>a</sup>

10 Robert Arlinghaus <sup>a, f</sup>

11

12

13 <sup>a</sup> Department of Biology and Ecology of Fishes, Leibniz-Institute of Freshwater Ecology and Inland Fisheries,

14 Müggelseedamm 310, D-12587 Berlin, Germany

15 <sup>b</sup> Institute for Landscape Architecture and Environmental Planning, Technische Universität Berlin, Strasse des

16 17. Juni 145, D-10623 Berlin, Germany

17 <sup>c</sup> Institutional and Behavioral Economics Working Group, Leibniz-Centre for Tropical Marine Research (ZMT),

18 Fahrenheitstraße 6, D-28359 Bremen, Germany

19 <sup>d</sup> Norwegian Institute for Nature Research, Fakkeltgarden, N-2624 Lillehammer, Norway

20 <sup>e</sup> GRECO, Institute of Aquatic Ecology, University of Girona, M. Aurèlia Capmany 69, SP-17003 Girona, Spain

21 <sup>f</sup> Division of Integrative Fisheries Management, Albrecht-Daniel-Thaer-Institute of Agriculture and Horticulture

22 & Integrative Research Institute for the Transformation of Human-Environment Systems, Faculty of Life

23 Sciences, Humboldt-Universität zu Berlin, Invalidenstrasse 42, D-10115 Berlin, Germany

24

25 \* Corresponding author (riepe@igb-berlin.de)

26

27

28

29

30

31 **Abstract**

32 Ecosystems and biodiversity produce benefits to society, but many of them are hard to quantify. For example, it  
33 is unclear whether European societies gain benefits from experiencing rivers that host high native biodiversity.  
34 Without such knowledge, monetary investments into ecologically oriented river management plans are difficult  
35 to justify. The objective of this study was to reveal how the public in four European countries values ecological  
36 characteristics of domestic rivers and the outcomes of hypothetical river basin management plans designed to  
37 improve river ecosystems, particularly fish biodiversity. We conducted a choice experiment among the  
38 populations in Norway, Sweden, Germany and France. We found similar preference structures in all countries  
39 with high marginal willingness-to-pay for improvements of abiotic river attributes (increased accessibility of the  
40 river banks, improved bathing water quality, decreased river fragmentation). Citizens also benefited from certain  
41 fish species occurring in a river with native salmonid species being more valued than nonnatives, particularly in  
42 Norway, and from the degree of a river's native biodiversity. Welfare measures calculated for selected river basin  
43 management plans (policy scenarios) revealed societal benefits that were primarily derived from ecological river  
44 management whereas a scenario focusing on hydroelectricity production generated the lowest utility. We  
45 conclude that ecological river management may produce high nonmarket economic benefits in all study  
46 countries, particularly through the management of abiotic river attributes and the restoration of declining or  
47 extinct fish species. Our results help to inform decisions on restoration efforts by showcasing the benefits that  
48 these measures have for the public.

49

50 **Keywords**

51 choice experiment, economic values, river basin management plan, river fish conservation, native biodiversity,  
52 hydropower dams

53

54

55

56

57

58

59

60

61

## 62 **Introduction**

63

64 Rivers and their fish populations deliver a range of ecosystem services (Holmlund and Hammer 1999; Auerbach  
65 et al. 2014), thereby contributing to human health and well-being (White et al. 2010; Nichols 2014). Due to a  
66 range of anthropogenic pressures (e.g., water abstraction, pollution, eutrophication, habitat degradation,  
67 damming, introduction of invasive species), the ecological status of many European watersheds, including the  
68 distribution of native fish species, has strongly declined over the last centuries (Dudgeon et al. 2006; Lenders et  
69 al. 2016). Today, riverine biodiversity has become one of the most threatened components of global biodiversity  
70 (Dudgeon et al. 2006; Collen et al. 2014), and ongoing economic development is further threatening river  
71 biodiversity in biodiversity hotspots (Zarfl et al. 2015; Winemiller et al. 2016). European freshwater fishes rank  
72 particularly high on the threat list relative to other vertebrates (Freyhof and Brooks 2011). Stressed ecosystems  
73 where biodiversity is in peril have been suggested to not deliver the full range of ecosystem services to society  
74 (Rockström et al. 2009; Sandifer et al. 2015), yet it is unclear to what extent this relationship applies to selected  
75 parts of the biotic world such as river fishes.

76

77 Ecological management ranks high on the priority list of many countries, which is reflected in their national  
78 policies and regulations aimed at curtailing biodiversity loss and restoring anthropogenically degraded  
79 ecosystems. In the European Union, the European Water Framework Directive (WFD; European Commission  
80 2000), which has also been adopted by Norway, is an example of a regulation directed at the conservation of  
81 aquatic ecosystems. This policy aims at fostering the improvement of the ecological condition of aquatic  
82 ecosystems until a “good ecological status” is reached by 2027 (Hering et al. 2010; European Commission  
83 2017). Recent assessments across Europe show that most surface waters fail to achieve a good status (or  
84 potential, for heavily modified or artificial water bodies), with rivers being generally in a worse condition than  
85 lakes (European Environment Agency 2018). The same is true for specific components of river biodiversity. For  
86 example, many riverine fish populations have strongly declined, and selected iconic species, such as Atlantic  
87 salmon (*Salmo salar*) and European eel (*Anguilla anguilla*) are threatened, and European sturgeon (*Acipenser*  
88 spp.) is virtually extinct across Europe (WWF 2001; Hindar 2003; Freyhof and Brooks 2011; Wolter 2015).

89

90 Conservation and restoration of these species demands considerable investment of public funds into river  
91 restoration (Szałkiewicz et al. 2018) like fish-friendly management of hydropower production (Nieminen et al.  
92 2016). Such investments can only be justified if the public receives significant economic benefits from rivers

93 with a good ecological status and from the presence of selected fish species. Estimating these benefits for the  
94 population at large requires an assessment of individual preferences for river development under trade-off  
95 conditions (European Commission 2000; Brouwer 2008). Given budgetary constraints, monetary values that the  
96 public associates with river attributes (e.g., the degree of biodiversity) can facilitate policy decisions on river  
97 basin management to meet ecological targets and to ensure that the costs are not disproportionate compared to  
98 the benefits that these actions generate for society (Brouwer 2008; Polizzi et al. 2015). One approach to eliciting  
99 the preferences of individual citizens for the status and future development of aquatic ecosystems are choice  
100 experiments (CE). CE are particularly well-suited for studying the trade-offs that precede preference formation  
101 in light of monetary constraints (Hanley et al. 2006; Brouwer 2008; Kataria 2009; Meyerhoff et al. 2014). We  
102 used a CE to evaluate the preferences for river attributes in four European countries (Norway, Sweden,  
103 Germany, France) and to understand whether ecological restoration goals align with nonmarket values attached  
104 by the general public to ecological river attributes as public goods. Modeling results were used to quantify the  
105 societal benefits of various policy scenarios as hypothetical outcomes of different river management strategies.

106

107 We assumed that people in all study countries prefer good water quality, easy access to the river banks and a  
108 high share of native biodiversity. We further expected that Scandinavians, particularly Norwegians, assign more  
109 value to specific fish species such as Atlantic salmon than the Germans or French because this species is  
110 economically and culturally more important in Norway, where it provides lucrative inland fisheries and  
111 aquaculture operations (WWF 2001; Hindar 2003) and has been receiving long-term coverage by mass media  
112 (Liu et al. 2016). By contrast, because species like Atlantic salmon are extinct in central Europe (e.g., in  
113 Germany) or strongly declining (as in France), central European citizens may have undergone an “extinction of  
114 experience” (Soga and Gaston 2016) and in turn may no longer benefit from knowing that a river is hosting  
115 salmon or other species they are hardly aware of (Kochalski et al. 2018).

116

## 117 **Materials and methods**

### 118 **Choice experiment and survey instrument**

119

120 A CE is a stated preference nonmarket valuation instrument that is consistent with utility maximization theory  
121 (Marschak 1960; McFadden 1974; Louviere et al. 2000) under the assumption that, given their budget  
122 constraints, people prefer one good over another good if the former maximizes the total expected utility gained  
123 from it. Due to the trade-offs implicit in a CE, the approach reveals more about respondents’ preferences and

124 their underlying utility structures than asking directly and separately for preferences for individual attributes of a  
125 good, because people tend to want the best of everything (e.g., Daigle et al. 2016). CE are especially suitable for  
126 assessing public preferences for nonmarket goods and intrinsic values like those associated with biodiversity and  
127 other river attributes.

128

129 In our CE, we defined rivers as “running waters that are wide enough to allow for boating with small pleasure  
130 boats such as kayaks, canoes, or rowing boats”. Respondents were then presented with descriptions of two  
131 hypothetical river development programs (Fig. 1) that were specified along the levels of seven attributes (Table  
132 1). To put the programs into temporal and spatial context, respondents were told that they would take effect  
133 within 10 years (Ahtiainen et al. 2015) and affect most rivers within a 50-km radius around their homes (Fig. 1).  
134 In the CE, we prompted respondents to consider only rivers within this area. A reference area defined by socially  
135 meaningful criteria (“home turf”; Liebich et al. 2018) promised to be more relevant to respondents than referring  
136 them to regions described in more biogeographical terms (like specific rivers or catchments; Liebich et al. 2018).

137 Respondents were further informed that to achieve the outcome of a program, an obligatory financial  
138 contribution to a hypothetical river development fund was required, which the respondents would have to pay  
139 annually for a 10-year period (price attribute; Table 1; Fig. 1). Given the cost of each development program,  
140 respondents had to decide which one they preferred (Option A vs. B; Fig. 1), or alternatively, whether they  
141 wanted to maintain the current ecological status of the rivers (status quo) within their reference areas without any  
142 additional costs (Option C; Fig. 1). Respondents were asked about their subjective perception of the ecological  
143 status of these rivers before the CE was administered. The choice task thus required the respondents to trade off  
144 the total utility derived from one development program against that of the other program, depending on how  
145 much, if at all, they valued each of the river attribute levels. The estimated disutility of income loss (i.e., the  
146 price to be paid for a program) was used to rescale the utilities derived for the nonmonetary attributes to  
147 monetary units as a common metric, which made utilities directly comparable (Hanemann 1984). Prior to the  
148 presentation of the choice sets, respondents were introduced to all attributes (Table 2) and their levels (Table 1).

149

150 The CE was constructed in a multi-stage development and pretest phase aiming to identify river attributes that  
151 indicate a good ecological status while being relevant to citizens' everyday life. The attributes also had to be  
152 independent of each other and changeable through (hypothetical) management measures, thus allowing for  
153 policy scenario analyses. This phase involved experts from the study countries as well as exploratory interviews  
154 with members of the general population. The first of the final attributes that fulfilled the relevance criteria was

155 the fish species occurring in a river (Attribute 1; Table 1). The levels of this attribute comprised two salmonid  
156 species (migratory Atlantic salmon and brown trout [*Salmo trutta*]; Table 1) that are native to all study countries.  
157 They can be considered flagship and umbrella species, that is, they are relevant to both fisheries and the general  
158 public, and indicative of a good ecological river status (Hindar 2003; Kalinkat et al. 2017). Economically  
159 important to Norway but extinct in Germany and endangered in France, Atlantic salmon is being restored in the  
160 latter two countries. It is also a familiar food product (WWF 2001; Hindar 2003; Wolter 2015), which  
161 nutritionists recommend for regular consumption (Dinter et al. 2016). We further included two nonnative  
162 salmonids (brook trout [*Salvelinus fontinalis*] and rainbow trout [*Oncorhynchus mykiss*]; Table 1) which were  
163 both introduced to Europe in the late 19th century (Aas et al. in press). These species are also known to the  
164 public as edible fishes but are often perceived as being native to Europe (Kochalski et al. 2018). Two further  
165 migratory fish species were included: threatened European eel and the extinct sturgeon (Table 1), which benefit  
166 from free flowing rivers when migrating to their spawning grounds (Nieminen et al. 2016). Grayling (*Thymallus*  
167 *thymallus*), another native salmonid, and bream (*Abramis brama*), a cyprinid, were also included (Table 1). These  
168 species were not expected to strongly increase river utility, but they are key species determining fish regions in  
169 European rivers (Huet 1949). Another biological attribute was the relative abundance of each species shown on  
170 the choice sets (defined as the “share of individual fish”; Attribute 2; Table 1). This attribute's levels ranged from  
171 0% to 70% to include even very high levels of abundance. We also included native biodiversity as a more  
172 generic attribute (“share of native animal and plant species”; Attribute 3; Table 1), whose levels ranged from  
173 10% to 100%, assuming that its highest level was ecologically most valuable. Referring directly to the presence  
174 of riverine organisms, these three attributes reflected biotic river characteristics.

175  
176 The remaining four attributes described abiotic river characteristics, primarily reflecting the human perspective  
177 on the use of rivers while still being closely related to biological river conditions. We included the degree of  
178 modification of the water flow due to hydropower dams as fourth attribute (Table 1), as it threatens the natural  
179 ecological function of rivers across the world (Zarfl et al. 2015; Winemiller et al. 2016; Couto and Olden 2018)  
180 and particularly migratory fishes (Lawrence et al. 2016; Cooper et al. 2017). This attribute implicitly required  
181 respondents to compare the utility derived from the production of climate-friendly electricity with the utility  
182 gained from knowing that fishes were able to migrate (Table 2) and other (e.g., aesthetic) values potentially  
183 associated with a free-flowing river. A free-flowing river was taken to be ecologically most valuable.  
184 Accessibility of the river banks (Attribute 5; Table 1) and the bathing water quality (Attribute 6; Table 1) were  
185 also deemed to be related to a good river status as perceived by the public (Hanley et al. 2006; Kataria 2009;

186 Artell and Huhtala 2017). The definitions of the attribute levels of bathing water quality (Table 2) were adapted  
187 from the water quality ladder used by Meyerhoff et al. (2014). Respondents were instructed to consider this  
188 attribute to be independent of whether they actually used a river for bathing or not. Riparian zones of rivers  
189 provide natural habitats for plants and animals, which can be destroyed through artificial embankments or effects  
190 of trampling (Arlinghaus et al. 2002; Tockner et al. 2010). Very difficult access to the river banks and very good  
191 bathing water quality were thus thought to indicate a river's good ecological status. The obligatory annual  
192 contribution to a hypothetical river development fund served as price attribute (Attribute 7; Table 1).

193

194 To familiarize respondents with the attributes and their levels, we ascertained their perceptions of the status quo  
195 of the rivers within their reference areas using rating scales with verbal descriptors identical to the attribute  
196 levels used in the CE (Ahtiainen et al. 2015). This was done for the share of native animal and plant species of  
197 the river, the modification of the water flow due to hydropower plants, the accessibility of the banks, and the  
198 bathing water quality (Attributes 3 to 6; Table 1). As we expected most study participants to have only little, if  
199 any, knowledge of the fish species assemblage in their nearby rivers (Kochalski et al. 2018; Liebich et al. 2018),  
200 we did not ask for the assumed presence of particular fish species and their abundance (Attributes 1 and 2; Table  
201 1).

202

203 Bayesian efficient statistical designs were created for a multinomial logit model (Scarpa and Rose 2008) to  
204 allocate attribute levels (Table 1) to river development programs to fully enumerate respondents' preferences for  
205 different attributes. As design criteria, we used D-efficiency and S-efficiency for which we created 32 choice  
206 sets each that were blocked into four distinct subsets each encompassing eight choice sets. Two design criteria  
207 were used to mitigate potential biases due to optimizing only for one criterion (Olsen and Meyerhoff 2016).  
208 Respondents were randomly assigned to one block of choice sets. The questionnaire also mapped the  
209 demographic background of the respondents.

210

## 211 **Data analysis**

212

213 The analysis of the stated choices is based on the random utility model (McFadden 1974). It assumes that an  
214 individual decision maker's preferences are the sum of a systematic ( $V$ ) and an unobservable or stochastic  
215 component ( $\varepsilon$ ), where  $V$  is an indirect utility function. If the stochastic component is distributed independently

216 and identically and follows a Gumbel distribution, the conditional probability that alternative  $i$  is chosen by  
217 individual  $n$  is defined as:

$$218 \quad P_{ni} = \frac{\exp(\mu\beta_k X_{ik})}{\sum_{j \in C} \exp(\mu\beta_k X_{jk})}, \quad (1)$$

219 where the scale parameter ( $\mu$ ) of the error distribution is confounded with the parameter vector  $\beta_k$  and generally  
220 normalized to 1,  $X_{ik}$  is attribute  $k$  of alternative  $i$ . As the simple logit is unable to account for unobserved taste  
221 heterogeneity and the fact that each respondent faced 8 choice sets (leading to repeated measures), we opted for a  
222 mixed logit model. This model is an extension of the basic multinomial logit model estimating not only the mean  
223 for each attribute parameter but also the deviation of each respondent from the sample mean taking unobserved  
224 taste heterogeneity into account (Train 2009). For all nonmonetary attributes, we assumed that the parameters  
225 specified as random follow a normal distribution. The cost attribute, however, was set to follow a lognormal  
226 distribution as it ensures that the coefficient has always the same sign; the cost attribute was multiplied by -1  
227 before estimation. We also investigated observed taste heterogeneity and included interactions between the  
228 alternative-specific constant for the current situation (ASCsq) and respondent-related characteristics. These  
229 comprised sociodemographic (age, gender, education) as well as environmental characteristics (land use and  
230 prevalence of rivers within the 50-km reference areas). Significant coefficients for the interactions indicate an  
231 influence of these characteristics on the likelihood that the status quo of the rivers (Option C; Fig. 1) is chosen  
232 instead of a program that would change the current ecological conditions in the river. To determine the  
233 environmental characteristics for each respondent individually, we sourced geographical information about the  
234 degree of urbanization and the number of rivers within their 50-km areas using GRASS GIS (Neteler et al.  
235 2012). We extracted geographical coordinates for the zipcode of each respondent and obtained land cover  
236 information from the European Corine Land Cover (CLC) 2012 database at a spatial resolution of 250x250m  
237 (<http://land.copernicus.eu/pan-european/corine-land-cover/clc-2012/view>). We also obtained a vector river  
238 network from the European CCM river and catchment database (<http://ccm.jrc.ec.europa.eu>; de Jager & Vogt  
239 2010). For further analysis the original CLC classes 1 to 11 were aggregated to a single thematic class  
240 representing urbanization. Subsequently, we calculated (i) the percentage of urban land cover and (ii) the number  
241 of unique rivers within a buffer radius of 50 km around each respondent's location. These data were matched  
242 with the survey data.

243

244 As the status quo of the rivers is expected to vary between respondents' reference areas due to natural causes, the  
245 assumption of a uniform status quo for all respondents can lead to biased coefficient and welfare estimates. We



246 therefore constructed individualized status-quo alternatives during the data modeling process according to the  
247 individual perception of the current river conditions as reported by each respondent. Because we used the same  
248 attribute levels for the description of the two river development programs on the choice sets (Options A and B;  
249 Fig. 1; Table 1) and the questionnaire-based assessment of the status quo, we were able to use distinct attribute  
250 levels to define each respondent's status-quo alternative (Option C; Fig. 1). If status-quo data were missing, we  
251 imputed them countrywise with the means of all respondents with nonmissing data (Ahtiainen et al. 2015). All  
252 model parameters were estimated by simulated maximum likelihood using Halton draws with 1000 replications.

253

254 Conversion of parameter estimates into marginal willingness-to-pay (MWTP) facilitates the comparison of  
255 parameters between countries because a common monetary scale unit (€) is used for all attributes. We estimated  
256 the MWTP values as the negative ratios of the attribute parameters and the cost parameter (Hanemann 1984).

257 They indicate how much respondents were willing to pay for a one-level change of a nonmonetary attribute, for  
258 example, from moderate to good bathing water quality quantifying the desirability of perceived benefits from the  
259 level change (Table 1). To calculate the MWTP estimates, we used the median value of the log-normally  
260 distributed price coefficient because using its mean value would have resulted in unreasonably low MWTP  
261 estimates close to zero. A model with a fixed price coefficient, in turn, would result in significantly lower model  
262 fit as it assumes that no heterogeneity exists among respondents towards cost. The median, on the other hand, is  
263 more robust to extreme values (Bliemer and Rose 2013), and the estimated coefficients are consistent with the  
264 estimated price coefficient of the mixed logit model with a fixed price coefficient (Sagebiel et al. 2017).

265

266 Subsequently, we calculated nonmarginal welfare measures (Hanemann 1984) for a range of policy scenarios.

267 The measures indicate the benefits accrued to society from a given combination of attribute level changes  
268 relative to the status quo:

$$269 \quad CS_n = -\frac{1}{\beta_{cost_n}} [\ln \sum_n \exp V_n^1 - \ln \sum_n \exp V_n^0]. \quad (2)$$

270 Here,  $CS$  is the compensating surplus welfare measure,  $\beta_{cost}$  is the marginal utility of income (the coefficient of  
271 the cost attribute) and  $V_n^0$  and  $V_n^1$  represent the  $n$ th individual's indirect utility functions before and after the  
272 change under consideration. We used the 95% confidence intervals to determine the statistical significance of all  
273 MWTP differences, and of within-country CS differences. Between-country CS differences were tested for  
274 significance using the Poe test (Poe et al. 2005).

275

276

277 **Policy scenarios**

278

279 We developed six policy scenarios to understand the population benefits in terms of CS values that may result  
280 from the ecological outcomes of distinct 10-year river basin management plans (Table 3). The resulting CS  
281 values reflect the joint effect of each scenario's combination of attribute levels relative to the baseline levels (for  
282 Attributes 1 and 2; Table 1) and to the individual status-quo levels (as ascertained for Attributes 3 to 6; Table 1),  
283 respectively, that were assumed for Option C (Fig. 1). The scenarios were set up according to different  
284 management strategies focusing either on (i) improved conditions for capture fisheries (Scenarios 1 and 2), (ii)  
285 nature conservation (Scenarios 3 and 4), or (iii) green-energy production through hydropower plants (Scenarios 5  
286 and 6; Table 3), alongside assumed impacts on fishes and general river biodiversity. By comparing the utilities  
287 of possible outcomes, our analyses showcase the benefits that river restoration may bring about in each of the  
288 four countries.

289

290 Both fisheries-oriented scenarios (Scenarios 1 and 2; Table 3) focused on salmonid fish species to maintain  
291 capture fisheries. The native-salmonid scenario (Scenario 1) had Atlantic salmon occurring very frequently,  
292 which would also benefit other riverine species. Therefore, this scenario also assumed a high level of native  
293 biodiversity and medium levels of the three abiotic attributes (Attributes 4 to 6; Table 3). The nonnative-  
294 salmonid fisheries scenario (Scenario 2) featured rainbow trout, which hardly reproduce in central Europe and  
295 therefore need to be stocked. This scenario assumed a correspondingly low share of native biodiversity, very  
296 easy accessibility of the banks for fishers to be able to reap the benefits of rainbow trout stocking and medium  
297 levels of the other two attributes (Table 3). The conservation-oriented scenarios (Scenarios 3 and 4; Table 3)  
298 were unrelated to fisheries. They included migratory Atlantic salmon as a flagship umbrella species (Kalinkat et  
299 al. 2017), indicating a good ecological river status, and had very high levels of native biodiversity (Table 3). In  
300 the native-salmonids conservation scenario (Scenario 3), Atlantic salmon occurred frequently in rivers with only  
301 few hydropower dams and good bathing water quality to render this scenario comparable to the native fisheries  
302 scenario (Scenario 1), but here we assumed difficult access to the river banks to improve the ecological quality  
303 of the riparian zone (Table 3). In the holistic-ecosystem scenario (Scenario 4), we assumed Atlantic salmon to  
304 occur less frequently, and for the three abiotic attributes we assumed the levels that we considered ecologically  
305 most valuable (i.e., no hydropower dams, very difficult accessibility, very good water quality; Table 3). The  
306 green-energy scenarios (Scenarios 5 and 6; Table 3) focused on the production of climate-friendly electricity  
307 from hydropower plants. Consequently, hydropower Scenario 5 assumed very many hydropower dams. As no

308 emphasis was put on fisheries in this scenario, we included frequently occurring bream as fish species, which is  
309 not often targeted by fishers and whose abundance increases in flow-regulated rivers, along with a very low level  
310 of native biodiversity, very easy accessibility and moderate water quality (Table 3). In Scenario 6, we maintained  
311 the goal of green-energy production while facilitating capture fisheries through regulated hydropower,  
312 comparable to the situation in Norway (Alfredsen et al. 2012). To that end, we assumed a reduced number of  
313 hydropower dams and ecologically improved levels of the other two abiotic attributes compared to hydropower  
314 Scenario 5. In addition, we assumed native brown trout, another flagship and umbrella species often targeted by  
315 fishers and indicative of a good ecological river status, to occur frequently together with a high level of native  
316 biodiversity (Table 3).

317

## 318 **Sample and data collection**

319

320 The questionnaire was administered by means of an internet-based survey that was carried out in September  
321 2015 among the general populations aged 16 to 74 years living in private households in Norway, Sweden,  
322 Germany and France ( $n=1,000$  per country). Study participants were randomly sampled from online consumer  
323 panels (with 40,000 to nearly 100,000 members per country) whose members had been previously recruited by  
324 phone (i.e., offline) using a probability-based, random digit-dialing method as sampling frame (Heckel et al.  
325 2014; ADM 2018). The online populations (i.e., persons living in households with internet access) covered  
326 between 83% (France) and 97% (Norway) of all private households (Germany: 90%; Sweden: 91%; Eurostat  
327 2016). Country-specific quotas were set on age groups, gender and the highest education level achieved (as  
328 standardized by the International Classification of Education ISCED; UNESCO 2016) according to census data  
329 (Eurostat 2015). Fieldwork including the development and administration of the questionnaire was planned and  
330 conducted following recommendations given by Dillman et al. (2014). The data collection phase was preceded  
331 by technical pretests and  $n=30$  pilot interviews per country. Participants of the main study were invited by email  
332 followed by up to three reminder emails.

333

## 334 **Results**

### 335 **Sample description**

336

337 The samples did not differ significantly in mean age (ranging from 41.5 years in France to 43.2 years in Sweden;  
338 post-hoc tests:  $p \geq .05$ ;  $F = 2.7$ ,  $df = 3$ ) and gender composition (Table 4) but slightly differed in education levels

339 (Table 4). These distributions mirror the online populations of the four countries according to census data  
340 (Eurostat 2015). Norwegian and Swedish respondents perceived the status quo of their nearby rivers quite  
341 similarly. Both assumed the rivers' native biodiversity to be higher, the accessibility of the banks easier and the  
342 bathing water quality better than the Germans and particularly the French (Table 5). While respondents in all  
343 countries characterized the water flow of the rivers as modified by only a few hydropower dams (Table 5), the  
344 Norwegians considered the water flow to be somewhat stronger modified than the Swedish and German  
345 respondents. The French perceived the least dam-related impact on the water flow (Table 5).

346

### 347 **Preferences for river attributes**

348

349 The negative parameter estimates for the ASCsq in all countries (Table 6) indicated that the respondents derived  
350 utility from moving away from the status quo and thus from choosing to contribute financially to a river  
351 development program. Coefficients for the interactions between the ASCsq and the sociodemographic and  
352 environmental characteristics showed mixed results. While the utility of the status-quo alternative increased with  
353 increasing age in all countries, and with being female in France, it decreased for female respondents in Germany  
354 (Table 6). Furthermore, its utility decreased in Norway and Sweden with increasing degree of urbanization and  
355 increased in Norway with increasing number of nearby rivers (Table 6).

356

357 Except for grayling, all fish species contributed to a river's perceived utility, relative to bream, in at least one  
358 country. Five species provided benefits in France and in Norway, four in Sweden and two in Germany (Table 6).  
359 The native salmonid species (Atlantic salmon, brown trout) were generally more appreciated than the nonnatives  
360 (brook and rainbow trouts) as evidenced by the total number of significant parameters across all countries (seven  
361 vs. four, respectively; Table 6). Also, utility was derived from European eel in France and Sweden and by  
362 sturgeon in France, Germany and Norway (Table 6). The relative abundance of a fish species in a river did not  
363 impact utility, except in Germany where its influence was negative (Table 6). An increase in the share of native  
364 biodiversity and in bathing water quality increased utility in all countries as did an increase in accessibility of the  
365 river banks, except in Germany (Table 6). The more a river's water flow was modified due to hydropower dams,  
366 the more the expected utility of a river decreased in all countries (Table 6).

367

368 In line with economic theory, the negative sign of the cost attribute indicates the decreasing probability of a  
369 respondent to choose an alternative when its price rises (Table 6). In all countries, the standard deviations for

370 most attributes were significant, in some instances solely the standard deviation became significant (Table 6). As  
371 the random parameter model captures unobserved taste heterogeneity with respect to the attributes, significant  
372 standard deviations indicate the presence of taste heterogeneity in the sample. The model results thus bear  
373 witness to considerable unobserved taste heterogeneity among respondents implying strong differences in  
374 preferences within the populations.

375

### 376 **Marginal willingness-to-pay (MWTP) for river attributes**

377

378 A comparison of the MWTP values within fish species (Attribute 1) across countries as well as across species  
379 within countries resulted in only few significant differences as evidenced by nonoverlapping confidence intervals  
380 (Table 7). Within-country differences were found only in Norway where native salmonids (Atlantic salmon:  
381 160.7 € brown trout: 147.2 €per year) were valued higher than sturgeon and nonnative brook and rainbow trouts  
382 (38.2 € 47.7 €and 59.4 €per year, respectively). The Norwegian MWTP for Atlantic salmon was also the only  
383 species-related value that differed significantly from its corresponding value in another country (France: 40.6 €  
384 per year; Table 7). An increase in the relative abundance of the focal fish species (Attribute 2) affected a river's  
385 utility only in Germany where it led to a decrease in MWTP by 1.3 €per year per % increase. An increase in  
386 native river biodiversity (Attribute 3) increased river utility in Germany, Norway and Sweden by 1.7, 0.5 and 1.5  
387 €per year, respectively, per % increase (Table 7). As for the MWTP values of the abiotic attributes, which  
388 quantify the change in utility for a one-level increment of an attribute, countries differed strongly in the disutility  
389 entailed by an increase in the number of hydropower dams (Attribute 4). Whereas a one-level increase decreased  
390 the amount of money people would be willing to pay for a river development plan in Germany by 98.3 €per  
391 year, the MWTP in Norway decreased by only 8.6 €per year (Table 7). The negative utility of this attribute in  
392 France was higher than the latter (25.4 €per year), while the Swedish MWTP decreased by 54.5 €per year  
393 (Table 7). MWTP values associated with a one-level increase in the accessibility of the river banks (Attribute 5)  
394 and in bathing water quality (Attribute 6) increased by approximately the same amounts in both France and  
395 Norway (accessibility: 13 €per year; bathing water quality: 22 €per year; Table 7). For bathing water quality,  
396 economic values in Germany and Sweden were higher and also very similar (79 €per year; Table 7). The  
397 MWTP value of the accessibility in Sweden was 48 €per year, while this attribute did not significantly add to a  
398 river's perceived utility in Germany (Table 7).

399

400

401 **Benefits of the policy scenarios**

402

403 All scenarios provided nonzero benefits to the four societies except for the hydropower (green-energy) Scenario  
404 5 in Germany (Table 8). In the other three countries, this scenario still delivered the lowest CS values of all  
405 scenarios. Moreover, it was the only one whose CS values showed 95%-confidence intervals that did not overlap  
406 with those of other scenarios in the same country. Except in Sweden, the hydropower (green-energy) Scenario 5  
407 delivered lower benefits than the scenario focusing on fisheries for native salmonids (Scenario 1) and both  
408 conservation-oriented scenarios (Scenarios 3 and 4; Table 8). Apart from the value-lowering presence of very  
409 many hydropower dams (Table 7), the low utilities derived from the hydropower (green-energy) scenario also  
410 originated from moderate bathing water quality, very low share of native biodiversity and very frequent  
411 occurrence of bream, the reference species (Table 3). The joint CS-diminishing effect of these attribute levels,  
412 however, was compensated for as soon as the green-energy management strategy underlying hydropower  
413 Scenario 5 was modified to also attain the goal of facilitating capture fisheries for native brown trout, alongside  
414 improvements in native biodiversity and bathing water quality (Scenario 6; Tables 3, 8). In consequence,  
415 nonoverlapping confidence intervals between both hydropower scenarios in all four countries indicated a  
416 significant increase in CS from a strict hydropower management strategy (Scenario 5) to a strategy that  
417 additionally facilitated fisheries (Scenario 6; Table 8).

418

419 Countries differed, however, regarding the general level of economic values generated through the scenarios. As  
420 evidenced by significant Poe-test results (Table 8), the Swedes benefited substantially more than the French and  
421 Norwegian citizens from all six scenarios while none of the CS differences between the latter two countries was  
422 significant (CS range in Sweden: 245.4 €to 699.6 €per year; in France: 77.6 €to 226.4 €per year; in Norway:  
423 67.0 €vs. 303.7 €per year; Table 8). Compared to these consistent differences, welfare estimates in Germany  
424 varied from scenario to scenario relative to the other countries (CS range in Germany: 75.6 €to 685.6 €per year;  
425 Table 8). Despite these between-country differences in value levels, the significantly lower CS values found in  
426 every country for the hydropower (green-energy) Scenario 5, and their improvement when expanding the  
427 management goal by capture fisheries (Scenario 6), suggest uniform within-country variations of the combined  
428 impact of each scenario's combination of attribute levels (Table 8).

429

430

431

432 **Discussion**

433

434 We investigated the preferences of the general population of France, Germany, Norway and Sweden for  
435 hypothetical river development programs aimed at improving the ecological status of rivers in the vicinity of  
436 respondents' places of residence, including riverine biodiversity and the rivers' potential for fisheries. We found  
437 that citizens in all study countries had similar preferences for river attributes and generally benefited from these  
438 programs though at different levels of MWTP and CS. In all countries, MWTP estimates drove total river utility  
439 in the same direction resulting in similar patterns of differences in CS values across the six policy scenarios.  
440 Simultaneously, significant standard deviations associated with model coefficients signaled taste heterogeneity  
441 in the population. The development of nearby rivers was generally preferred to maintaining their perceived  
442 ecological status quo. The abiotic river attributes, particularly a minimized number of hydropower dams and  
443 good bathing water quality, contributed considerably to total river utility. Of the biotic attributes, only the fish  
444 species occurring in a river made a substantive, though country-specifically varying, contribution but not a  
445 species' abundance or a river's native biodiversity. Our hypotheses about people's preference for good water  
446 quality, easy river bank access and native biodiversity thus received support as did our assumption of country-  
447 specific preferences for particular fish species. We propose a range of mechanisms for our findings below.

448

449 While five fish species added to a river's perceived utility in France (rainbow trout, Atlantic salmon, brown trout,  
450 European eel, sturgeon) and Norway (brook trout, rainbow trout, Atlantic salmon, brown trout, sturgeon), more  
451 species than in the other countries, the Norwegians gained significantly more utility than the French from  
452 Atlantic salmon. This species' high economic and cultural relevance in Norway is underscored by an MWTP  
453 value that is higher than those for most other species valued in this country (brook trout, rainbow trout,  
454 sturgeon). Across all countries, the native salmonid species (Atlantic salmon, brown trout) achieved seven  
455 nonzero MWTP values as opposed to four values for the nonnative salmonids (brook trout and rainbow trout),  
456 suggesting a cross-country preference for salmonid species that happen to be native (see Kochalski et al. 2018  
457 for perceived nativeness of salmonid species). Because in Sweden and Germany fewer species than in France  
458 and Norway exhibited significant MWTP values (four and two, respectively), our results collectively give rise to  
459 speculations that the societal significance of fish species might be declining along a longitudinal gradient from  
460 European countries with extensive Atlantic seaboard (Norway, France) to more eastward countries with only  
461 indirect access to the Atlantic ocean but with long coastlines bordering the Baltic sea (Sweden, Germany), and  
462 with large areas remote from any seashore (Germany). An explanation for these between-country differences

463 could be that European societies have been selectively affected by the "shifting baseline syndrom" (Pauly 1995).  
464 This process describes a long-term inter- and intragenerational extinction of knowledge of, and experience with,  
465 the conditions of the biological environments people live in due to a loss of opportunities to interact with nature  
466 (Papworth et al. 2009; Soga and Gaston 2016), including domestic fish species (Kochalski et al. 2018; Liebich et  
467 al. 2018) and possibly other components of river biodiversity. As a result, people may have become disconnected  
468 from (largely) extinct species like Atlantic salmon in countries such as Germany (Wolter 2015; Lenders et al.  
469 2016; Kochalski et al. 2018; Liebich et al. 2018). Such a development would be critical as a loss of memory of  
470 past environmental degradation may ultimately lead to a reduction in the public's engagement with, and notably  
471 their willingness-to-pay for, conservation efforts (McClenachan et al. 2018). While people were indifferent to  
472 grayling, European eel provided benefits to the French and Swedish societies as did sturgeon to all countries  
473 except Sweden. The latter two species either have been declining in recent years, such as eel in Germany, where  
474 it is economically still important to local-scale inland fisheries, or are threatened with extinction globally, like  
475 the sturgeon species (Freyhof and Brooks 2011). These findings suggest that expensive restoration activities  
476 tailored toward eel and sturgeon (e.g., BfN 2010; European Commission 2014) in countries where they were  
477 valued in our study are likely to receive considerable public support, whereas efforts to reintroduce, for instance,  
478 Atlantic salmon in Germany (e.g., Wolter 2015), the only country where this species was not valued, would not.  
479  
480 Confirming our hypothesis, native river biodiversity generated utility in three countries, a finding that was  
481 previously identified for rivers in Sweden (Kataria 2009) and in the UK (Hanley et al. 2006) as well as for the  
482 ocean (Jefferson et al. 2014; Jobstvogt et al. 2014; Daigle et al. 2016). The abundance of the focal fish species  
483 presented in the CE was only valued in Germany where it generated negative utility, suggesting a tendency  
484 among Germans to prefer a diversified assemblage of fish species that is not dominated by a single species,  
485 which is in line with a preference for general biodiversity. As both these attributes made only small contributions  
486 to CS values and in opposing directions, biodiversity in general provided little welfare to the four societies.  
487 People even benefited from nonnative fish species, whose occurrence may threaten freshwater biodiversity  
488 (Gozlan et al. 2010; Cucherousset and Olden 2011). The utility attached to these species may originate from the  
489 fact that they have been stocked for a long period of time (Aas et al. in press) and are likely considered  
490 naturalized across Europe (Kochalski et al. 2018), and also from their relevance in the diets of many Europeans.  
491 Though previous studies have shown the importance of perceived biodiversity to human health and well-being,  
492 this relationship is not direct and depends on the presence of particular species (Fuller et al. 2007; Pett et al.



493 2016). Moreover, the perceptions of biodiversity are often at odds with the actual biodiversity present in an  
494 ecosystem (Fuller et al. 2007; Shwartz et al. 2014; Belaire et al. 2015; Sandifer et al. 2015).

495

496 According to our results, the bathing water quality and the presence of hydropower plants as abiotic river  
497 characteristics were more important to people than ecological properties like biodiversity. Bathing water quality  
498 drove preferences significantly, particularly in Sweden and Germany, confirming results from previous studies in  
499 both freshwater and marine waters (Daigle et al. 2016; Artell and Huhtala 2017). A usability-based index of  
500 water quality like the one we employed was previously found to be correlated with an indicator that measured  
501 the ecological status according to the WFD (Artell and Huhtala 2017), suggesting that management towards  
502 good water quality may indirectly elevate biodiversity. The societal value attached to bathing water quality is  
503 probably linked to its perceived relationship with what people consider a clean and healthy river (Jefferson et al.  
504 2014; Daigle et al. 2016; Liebich et al. 2018). The usage of rivers for hydropower production also contributed  
505 significantly, though negatively, to a river's total utility, most of all in Germany and least so in Norway although  
506 the Norwegian respondents reported the comparatively strongest perceived impact (status quo) of hydropower  
507 dams on their rivers' water flow. While recently hydropower has had its rebirth in an attempt to increase  
508 renewable energy production worldwide (Zarfl et al. 2015; Winemiller et al. 2016; Couto and Olden 2018), in  
509 our survey, a river's utility decreased substantially with increasing fragmentation due to hydropower dams.  
510 Given the major negative impact that river fragmentation has had on riverine biodiversity over centuries (Wolter  
511 2015; Lawrence et al. 2016; Lenders et al. 2016), and is continuing to have globally (Zarfl et al. 2015;  
512 Winemiller et al. 2016; Cooper et al. 2017; Couto and Olden 2018), it is vital from an environmental perspective  
513 to implement measures (e.g., installing fish ladders for migratory fishes or applying administrative means to  
514 adjust a river's flow regime; Poff and Schmidt 2016) to better balance social and ecological requirements as was  
515 done in Norwegian watersheds (Alfredsen et al. 2012; Ruud and Fjeldstad 2015; Norwegian Environment  
516 Agency 2017). While such regulations are not in place in the small-scale hydropower operations common to, for  
517 example, Germany (Zarfl et al. 2015), the very low negative MWTP of hydropower in Norway may have  
518 resulted from this country's strong dependence on, and hence from a broad societal acceptance of, hydropower,  
519 or from the fact that Norway has protected more watersheds against hydropower development than, for instance,  
520 Sweden (Norwegian Environment Agency 2017; Swedish Environment Law 2017). Supporting our findings,  
521 Kataria (2009) found that Swedish households were willing to pay for environmental improvements in  
522 hydropower-regulated waters (like, e.g., ecologically optimized river vegetation or increased biodiversity). With  
523 the exception of Germany, easy access to the river banks was also preferred, particularly in Sweden. This result

524 agreed with previous findings from Poland (Birol et al., 2009). Because we informed our respondents in the  
525 survey that easy access to the river banks may cause the loss of natural habitats of riparian plants and animals  
526 (due to artificial embankments or trampling), the preferences found in this study imply that respondents also  
527 valued river conditions that are at least partly anthropocentric in nature (by providing roads to and pathways  
528 along the river banks) and may thus exert pressure on ecological river functioning.

529

530 Complementing the attribute-based utilities just discussed, results from the scenario analyses showed that the  
531 preferences for the outcomes of selected river basin management plans were very similar in the populations of  
532 the four European countries albeit at different CS levels. Our findings showcase the benefits that ecological river  
533 management and restoration can provide to the four countries, most strongly in Sweden but also in Germany.  
534 The findings also demonstrate how a management plan that fails to meet the general population's preferences (as  
535 in the case of the green-energy hydropower Scenario 5) can cause a significant decline of a river's perceived  
536 economic value (compared to the native-salmonid fisheries Scenario 1 and to both conservation-oriented  
537 Scenarios 3 and 4). But the results also reveal how the CS values can be improved when the management  
538 strategy is revised to also supply ecosystem services such as capture fisheries for native salmonids (Scenario 6).

539

540 In terms of the limitations of our study, the low importance found for the biotic attributes needs to be interpreted  
541 with some caution. Although previous research has found that the general public was indeed able to derive  
542 economic values from unfamiliar ecological objects such as biodiversity (e.g., Börger and Hattam 2017), the  
543 potential of a CE to inform respondents about the ecological relevance of river attributes is limited. Despite our  
544 attempt to familiarize respondents with the attributes beforehand, respondents are unlikely to have been fully  
545 knowledgeable about biodiversity and the benefits it provides to society. In consequence, respondents may also  
546 have expressed their preferences for biodiversity indirectly through choosing high levels of water quality and  
547 fewer dams assuming that biodiversity would benefit from both. Moreover, the study context may have  
548 overemphasized negative aspects of hydropower production. We introduced the questionnaire as a survey on  
549 “humans-rivers-species diversity” which may have biased respondents’ answers in a proecological direction.  
550 Had the CE been administered in a survey on, for example, electricity production, hydropower may have  
551 performed more positively in relation to fossil fuel or nuclear power.

552

553

554

555 **Implications and conclusions**

556

557 Our findings have five main implications. First, all significant MWTP values had the same algebraic signs in all  
558 countries. These unidirectional impacts suggest a common preference structure, which was corroborated by a  
559 uniform pattern of within-country variations of the CS values across the scenarios. Second, the differing levels of  
560 the utility estimates between the countries likely result from cultural and biogeographical differences between  
561 the countries emphasizing the necessity to consider the specific societal conditions in each country in the public  
562 discourse about the values of nature and biodiversity conservation. Third, citizens in all countries preferred  
563 ecologically valuable conditions, which simultaneously supply ecosystem services (e.g., good bathing water  
564 quality, fisheries), with the preference for easy bank access and for nonnative salmonids being important  
565 exceptions. Forth, the relevance of selected fish species varied between the four countries, which has  
566 implications for the acceptability of species-centered conservation efforts. Lastly, the scenario analyses  
567 demonstrated that our CE data allow for a comparison of a range of alternative river basin management goals.  
568 These data can thus be used for informing policy makers' decisions on improvements of the ecological status of  
569 domestic rivers while gauging each decision's social benefit (or cost).

570

571 To conclude, our results show that ecological river management can create high levels of economic benefits in  
572 particular through an optimal combination of the three abiotic river attributes (hydropower dams, bank  
573 accessibility, bathing water quality) but also through efforts to restore declining or extinct fish species. Thus, if  
574 environmental managers also considered biotic river characteristics, including the fish species assemblage, even  
575 more benefits could be generated. As the common cross-country utility structure allows for taking advantage of  
576 synergy effects in planning efforts within the European Union and cooperating countries (Norway), our results  
577 give indications of which policies are likely to generate high societal benefits that might justify even expensive  
578 river restoration efforts.

579

580 **Complicance with Ethical Standards**

581

582 The authors declare that they have no conflict of interest. All procedures in this study involving human  
583 participants were conducted according to the ethical standards of the German Research Foundation (DFG) and in  
584 compliance with national data protection acts.

585

586 **Acknowledgments**

587

588 This study was funded by the German Research Foundation (DFG; grant to R.A., number AR 712/4-1) within  
589 the project SalmoInvade in the BiodivERsA 2012-2013 Pan-European call (supported by the EU's Horizon 2020  
590 research and innovation program). R.A. also received funding from the German Federal Ministry of Education  
591 and Research (BMBF) within the project Besatzfisch (grant number 01UU0907) in the Programme for Social-  
592 Ecological Research and through the EU's Horizon 2020 program under the Marie Skłodowska-Curie grant  
593 agreement (No 642893). We are grateful to Ulf Liebe, Julian Sagebiel, Wolfgang Bandilla, Michael Braun and to  
594 our colleagues at Leibniz-Institute of Freshwater Ecology and Inland Fisheries and Humboldt-Universität zu  
595 Berlin for insightful comments on the study concept and data interpretation. We would also like to thank  
596 Dorothée Behr, Julien Cucherousset, Jörgen Johnsson, Kjetil Hindar, all other members of the SalmoInvade  
597 project and the team of Language Connect for assisting with the translation of the questionnaire and for  
598 discussing its content. Special thanks go to Frederik Funke, Marco Reich, Alexandra Wachenfeld and all others  
599 at LINK, forsa and Norstat for collecting the data and to all study participants for their kind cooperation.

600

601

602 **References**

603 Aas Ø, Cucherousset J, Fleming IA, et al (in press) Salmonid stocking in five North Atlantic jurisdictions –  
604 identifying drivers and barriers to policy change. *Aquat Conserv.*

605 ADM Arbeitskreis Deutscher Markt- und Sozialforschungsinstitute e. V. (2018) The ADM-Sampling-System for  
606 Telephone Surveys. <https://www.adm-ev.de/telefonbefragungen/?L=1>. Accessed 30 May 2018

607 Ahtainen H, Pouta E, Artell J (2015) Modelling asymmetric preferences for water quality in choice experiments  
608 with individual-specific status quo alternatives. *Water Resour Econ* 12:1–13. doi: 10.1016/j.wre.2015.10.003

609 Alfredsen K, Harby A, Linnansaari T, Ugedal O (2012) Development of an inflow-controlled environmental  
610 flow regime for a Norwegian river. *River Res Appl* 28:731–739. doi: 10.1002/rra.1550

611 Arlinghaus R, Engelhardt C, Sukhodolov A, Wolter C (2002) Fish recruitment in a canal with intensive  
612 navigation: implications for ecosystem management. *J Fish Biol* 61:1386–1402. doi:  
613 doi:10.1006/jfbi.2002.2148

614 Artell J, Huhtala A (2017) What are the benefits of the Water Framework Directive? Lessons learned for policy  
615 design from preference revelation. *Environ Resour Econ* 68:847–873. doi: 10.1007/s10640-016-0049-8

- 616 Auerbach DA, Deisenroth DB, McShane RR, et al (2014) Beyond the concrete: accounting for ecosystem  
617 services from free-flowing rivers. *Ecosyst Serv* 10:1–5. doi: 10.1016/j.ecoser.2014.07.005
- 618 Belaire JA, Westphal LM, Whelan CJ, Minor ES (2015) Urban residents’ perceptions of birds in the  
619 neighborhood: biodiversity, cultural ecosystem services, and disservices. *Condor* 117:192–202. doi:  
620 10.1650/CONDOR-14-128.1
- 621 BfN Bundesamt für Naturschutz (ed) (2010) German action plan for the conservation and restoration of the  
622 European sturgeon (*Acipenser sturio*). Federal Ministry for the Environment, Nature Conservation and  
623 Nuclear Safety (BMU), Bonn, Germany
- 624 Birol E, Hanley N, Koundouri P, Kountouris Y (2009) Optimal management of wetlands: quantifying trade-offs  
625 between flood risks, recreation, and biodiversity conservation. *Water Resour Res* 45:. doi:  
626 10.1029/2008WR006955
- 627 Bliemer MCJ, Rose JM (2013) Confidence intervals of willingness-to-pay for random coefficient logit models.  
628 *Transp Res Part B* 58:199–214. doi: 10.1016/j.trb.2013.09.010
- 629 Börger T, Hattam C (2017) Motivations matter: behavioural determinants of preferences for remote and  
630 unfamiliar environmental goods. *Ecol Econ* 131:64–74. doi: 10.1016/j.ecolecon.2016.08.021
- 631 Brouwer R (2008) The potential role of stated preference methods in the Water Framework Directive to assess  
632 disproportionate costs. *J Environ Plan Manag* 51:597–614. doi: 10.1080/09640560802207860
- 633 Collen B, Whitton F, Dyer EE, et al (2014) Global patterns of freshwater species diversity, threat and endemism.  
634 *Glob Ecol Biogeogr* 23:40–51. doi: 10.1111/geb.12096
- 635 Cooper AR, Infante DM, Daniel WM, et al (2017) Assessment of dam effects on streams and fish assemblages  
636 of the conterminous USA. *Sci Total Environ* 586:879–889. doi: 10.1016/j.scitotenv.2017.02.067
- 637 Couto TBA, Olden JD (2018) Global proliferation of small hydropower plants – science and policy. *Front Ecol*  
638 *Environ* 16:91–100. doi: 10.1002/fee.1746
- 639 Cucherousset J, Olden JD (2011) Ecological impacts of non-native freshwater fishes. *Fisheries* 36:215–230. doi:  
640 10.1080/03632415.2011.574578
- 641 Daigle RM, Haider W, Fernández-Lozada S, et al (2016) From coast to coast: public perception of ocean-derived  
642 benefits in Canada. *Mar Policy* 74:77–84. doi: 10.1016/j.marpol.2016.09.012
- 643 de Jager AL, Vogt J V. (2010) Development and demonstration of a structured hydrological feature coding  
644 system for Europe. *Hydrol Sci J* 55:661–675. doi: 10.1080/02626667.2010.490786
- 645 Dillman DA, Smyth JD, Christian LM (2014) *Internet, Phone, Mail, and Mixed-Mode Surveys*. Wiley & Sons,  
646 Hoboken, New Jersey, USA

- 647 Dinter J, Bechthold A, Boeing H, et al (2016) Fish intake and prevention of selected nutrition-related diseases.  
648 Ernährung Umschau 63:148–154. doi: 10.4455/eu.2016.032
- 649 Dudgeon D, Arthington AH, Gessner MO, et al (2006) Freshwater biodiversity: importance, threats, status and  
650 conservation challenges. Biol Rev Camb Philos Soc 81:163–182. doi: 10.1017/S1464793105006950
- 651 European Commission (2000) Directive 2000/60/EC of the European Parliament and of the Council establishing  
652 a framework for the Community action in the field of water policy. [http://eur-lex.europa.eu/legal-](http://eur-lex.europa.eu/legal-content/EN/TXT/PDF/?uri=CELEX:32000L0060&from=EN)  
653 [content/EN/TXT/PDF/?uri=CELEX:32000L0060&from=EN](http://eur-lex.europa.eu/legal-content/EN/TXT/PDF/?uri=CELEX:32000L0060&from=EN). Accessed 31 Oct 2016
- 654 European Commission (2014) Report from the commission to the Council and the European parliament on the  
655 outcome of the implementation of the Eel Management Plan. [https://eur-](https://eur-lex.europa.eu/resource.html?uri=cellar:d77e3ffd-5918-11e4-a0cb-01aa75ed71a1.0006.03/DOC_1&format=PDF)  
656 [lex.europa.eu/resource.html?uri=cellar:d77e3ffd-5918-11e4-a0cb-](https://eur-lex.europa.eu/resource.html?uri=cellar:d77e3ffd-5918-11e4-a0cb-01aa75ed71a1.0006.03/DOC_1&format=PDF)  
657 [01aa75ed71a1.0006.03/DOC\\_1&format=PDF](https://eur-lex.europa.eu/resource.html?uri=cellar:d77e3ffd-5918-11e4-a0cb-01aa75ed71a1.0006.03/DOC_1&format=PDF). Accessed 25 Jul 2018
- 658 European Commission (2017) WFD: Timetable for implementation.  
659 [http://ec.europa.eu/environment/water/water-framework/info/timetable\\_en.htm](http://ec.europa.eu/environment/water/water-framework/info/timetable_en.htm). Accessed 9 Jan 2017
- 660 European Environment Agency (2018) European waters - assessment of status and pressures. Publications Office  
661 of the European Union, Luxembourg, Luxembourg
- 662 Eurostat (2015) Census data for the online populations. <http://ec.europa.eu/eurostat/de/data/database>. Accessed  
663 30 May 2018
- 664 Eurostat (2016) Information on internet penetration. [http://ec.europa.eu/eurostat/statistics-](http://ec.europa.eu/eurostat/statistics-explained/index.php/Digital_economy_and_society_statistics_-_households_and_individuals)  
665 [explained/index.php/Digital\\_economy\\_and\\_society\\_statistics\\_-\\_households\\_and\\_individuals](http://ec.europa.eu/eurostat/statistics-explained/index.php/Digital_economy_and_society_statistics_-_households_and_individuals). Accessed 1  
666 Jun 2018
- 667 Freyhof J, Brooks E (2011) European red list of freshwater fishes. Publications Office of the European Union,  
668 Luxembourg
- 669 Fuller RA, Irvine KN, Devine-Wright P, et al (2007) Psychological benefits of greenspace increase with  
670 biodiversity. Biol Lett 3:390–394. doi: 10.1098/rsbl.2007.0149
- 671 Gozlan RE, Britton JR, Cowx I, Copp GH (2010) Current knowledge on non-native freshwater fish  
672 introductions. J Fish Biol 76:751–786. doi: 10.1111/j.1095-8649.2010.02566.x
- 673 Hanemann WM (1984) Welfare evaluations in contingent valuation experiments with discrete responses. Am J  
674 Agric Econ 66:332–341
- 675 Hanley N, Wright RE, Alvarez-Farizo B (2006) Estimating the economic value of improvements in river ecology  
676 using choice experiments: an application to the water framework directive. J Environ Manage 78:183–193.  
677 doi: 10.1016/j.jenvman.2005.05.001

- 678 Heckel C, Glemser A, Meier G (2014) Das ADM-Telefonstichproben-System. In: ADM Arbeitskreis Deutscher  
679 Markt- und Sozialforschungsinstitute e. V. (ed) Stichproben-Verfahren in der Umfrageforschung. Springer,  
680 Wiesbaden, Germany, pp 137–166
- 681 Hering D, Borja A, Carstensen J, et al (2010) The European Water Framework Directive at the age of 10: a  
682 critical review of the achievements with recommendations for the future. *Sci Total Environ* 408:4007–4019.  
683 doi: 10.1016/j.scitotenv.2010.05.031
- 684 Hindar K (2003) Wild Atlantic salmon in Europe: status and perspectives. In: Gallagher P, Wood L (eds) The  
685 World Summit on Salmon. Continuing Studies in Science, Burnaby, British Columbia, Canada, pp 47–52
- 686 Holmlund CM, Hammer M (1999) Ecosystem services generated by fish populations. *Ecol Econ* 29:253–268
- 687 Huet M (1949) Aperçu des relations entre la pente et les populations piscicoles des eaux courantes.  
688 *Schweizerische Zeitschrift für Hydrol* 11:332–351. doi: 10.1007/BF02503356
- 689 Jefferson RL, Bailey I, Laffoley D d’A, et al (2014) Public perceptions of the UK marine environment. *Mar*  
690 *Policy* 43:327–337. doi: 10.1016/j.marpol.2013.07.004
- 691 Jobstvogt N, Hanley N, Hynes S, et al (2014) Twenty thousand sterling under the sea: estimating the value of  
692 protecting deep-sea biodiversity. *Ecol Econ* 97:10–19. doi: 10.1016/j.ecolecon.2013.10.019
- 693 Kalinkat G, Cabral JS, Darwall W, et al (2017) Flagship umbrella species needed for the conservation of  
694 overlooked aquatic biodiversity. *Conserv Biol* 31:481–485. doi: 10.1111/cobi.12813
- 695 Kataria M (2009) Willingness to pay for environmental improvements in hydropower regulated rivers. *Energy*  
696 *Econ* 31:69–76. doi: 10.1016/j.eneco.2008.07.005
- 697 Kochalski S, Riepe C, Fujitani M, et al (2018) Public perception of river fish biodiversity in four European  
698 countries. *Conserv Biol*. doi: 10.1111/cobi.13180
- 699 Lawrence ER, Kuparinen A, Hutchings JA (2016) Influence of dams on population persistence in Atlantic  
700 salmon (*Salmo salar*). *Can J Zool* 94:329–338
- 701 Lenders HJR, Chamuleau TPM, Hendriks AJ, et al (2016) Historical rise of waterpower initiated the collapse of  
702 salmon stocks. *Sci Rep* 6:. doi: 10.1038/srep29269
- 703 Liebich KB, Kocik JF, Taylor WW (2018) Reclaiming a space for diadromous fish in public psyche and sense of  
704 place. *Fisheries* 43:231–240. doi: <https://doi.org/10.1002/fsh.10063>
- 705 Liu P, Lien K, Asche F (2016) The impact of media coverage and demographics on the demand for Norwegian  
706 salmon. *Aquac Econ Manag* 20:342–356. doi: 10.1080/13657305.2016.1212126
- 707 Louviere JJ, Hensher DA, Swait JD (2000) Stated choice methods. Cambridge University Press, Cambridge, UK

- 708 Marschak J (1960) Binary choice constraints on random utility indicators. In: Arrow KJ, Karlin S, Suppes P  
709 (eds) Stanford Symposium on Mathematical Methods in the Social Sciences. Stanford University Press,  
710 Stanford, California, USA, pp 312–329
- 711 McClenachan L, Matsuura R, Shah P, Dissanayake STM (2018) Shifted baselines reduce willingness to pay for  
712 conservation. *Front Mar Sci* 5:. doi: 10.3389/fmars.2018.00048
- 713 McFadden D (1974) Conditional logit analysis of qualitative choice behavior. In: Zarembka P (ed) *Frontiers in*  
714 *econometrics*. Academic Press, New York, New York, USA, pp 105–142
- 715 Meyerhoff J, Boeri M, Hartje V (2014) The value of water quality improvements in the region Berlin–  
716 Brandenburg as a function of distance and state residency. *Water Resour Econ* 5:49–66. doi:  
717 <http://dx.doi.org/10.1016/j.wre.2014.02.001>
- 718 Neteler M, Bowman MH, Landa M, Metz M (2012) GRASS GIS: A multi-purpose open source GIS. *Environ*  
719 *Model Softw* 31:124–130. doi: 10.1016/j.envsoft.2011.11.014
- 720 Nichols WJ (2014) *Blue mind*. Back Bay Books, New York, New York, USA
- 721 Nieminen E, Hyytiäinen K, Lindroos M (2016) Economic and policy considerations regarding hydropower and  
722 migratory fish. *Fish Fish*. doi: 10.1111/faf.12167
- 723 Norwegian Environment Agency (2017) Protection plan for water resources.  
724 <http://www.miljodirektoratet.no/en/Areas-of-activity1/Inland-waters/Protection-Plan-for-Water-Resources/>.  
725 Accessed 20 Jan 2017
- 726 Olsen SB, Meyerhoff J (2016) Will the alphabet soup of design criteria affect discrete choice experiment results?  
727 *Eur Rev Agric Econ*. doi: 10.1093/erae/jbw014
- 728 Papworth SK, Rist J, Coad L, Milner-Gulland EJ (2009) Evidence for shifting baseline syndrome in  
729 conservation. *Conserv Lett* 2:93–100. doi: 10.1111/j.1755-263X.2009.00049.x
- 730 Pauly D (1995) Anecdotes and the shifting baseline syndrome of fisheries. *Trends Ecol Evol* 10:430
- 731 Pett TJ, Shwartz A, Irvine KN, et al (2016) Unpacking the people–biodiversity paradox: a conceptual  
732 framework. *Bioscience* 66:576–583. doi: 10.1093/biosci/biw036
- 733 Poe GL, Giraud KL, Loomis JB (2005) Computational methods for measuring the difference of empirical  
734 distributions. *Am J Agric Econ* 87:353–365
- 735 Poff NL, Schmidt JC (2016) How dams can go with the flow. *Science* (80- ) 353:1099–1100. doi:  
736 10.1126/science.aah4926



- 737 Polizzi C, Simonetto M, Barausse A, et al (2015) Is ecosystem restoration worth the effort? The rehabilitation of  
738 a Finnish river affects recreational ecosystem services. *Ecosyst Serv* 14:158–169. doi:  
739 10.1016/j.ecoser.2015.01.001
- 740 Rockström J, Steffen W, Noone K, et al (2009) A safe operating space for humanity. *Nature* 461:472–475
- 741 Ruud AA, Fjeldstad H-P (2015) Vannforskriften og norsk vannkraftproduksjon. Kan miljødesign og  
742 funksjonsmål gi bedre planprosesser? *VANN* 152–162. doi: 10.13140/RG.2.1.3531.8881
- 743 Sagebiel J, Glenk K, Meyerhoff J (2017) Spatially explicit demand for afforestation. *For Policy Econ* 78:190–  
744 199. doi: 10.1016/j.forpol.2017.01.021
- 745 Sandifer PA, Sutton-Grier AE, Ward BP (2015) Exploring connections among nature, biodiversity, ecosystem  
746 services, and human health and well-being: opportunities to enhance health and biodiversity conservation.  
747 *Ecosyst Serv* 12:1–15. doi: 10.1016/j.ecoser.2014.12.007
- 748 Scarpa R, Rose J (2008) Design efficiency for non-market valuation with choice modelling: how to measure it,  
749 what to report and why. *Aust J Agric Resour Econ* 253–282. doi: 10.1111/j.1467-8489.2007.00436.x
- 750 Shwartz A, Turbé A, Simon L, Julliard R (2014) Enhancing urban biodiversity and its influence on city-  
751 dwellers: an experiment. *Biol Conserv* 171:82–90. doi: 10.1016/j.biocon.2014.01.009
- 752 Soga M, Gaston KJ (2016) Extinction of experience: the loss of human-nature interactions. *Front Ecol Environ*  
753 14:94–101. doi: 10.1002/fee.1225
- 754 Swedish Environment Law Miljöbalk (1998:808) (2017) [http://www.riksdagen.se/sv/dokument-](http://www.riksdagen.se/sv/dokument-lagar/dokument/svensk-forfattningssamling/miljobalk-1998808_sfs-1998-808)  
755 [lagar/dokument/svensk-forfattningssamling/miljobalk-1998808\\_sfs-1998-808](http://www.riksdagen.se/sv/dokument-lagar/dokument/svensk-forfattningssamling/miljobalk-1998808_sfs-1998-808). Accessed 20 Jan 2017
- 756 Szałkiewicz E, Jusik S, Grygoruk M (2018) Status of and perspectives on river restoration in Europe: 310,000  
757 Euros per hectare of restored river. *Sustain* 10:. doi: 10.3390/su10010129
- 758 Tockner K, Pusch M, Borchardt D, Lorang MS (2010) Multiple stressors in coupled river-floodplain ecosystems.  
759 *Freshw Biol* 55:135–151. doi: 10.1111/j.1365-2427.2009.02371.x
- 760 Train K (2009) *Discrete choice methods with simulation*. Cambridge University Press, Cambridge, UK
- 761 UNESCO (2016) *ISCED: International standard classification of education*.  
762 <http://www.uis.unesco.org/Education/Pages/international-standard-classification-of-education.aspx>.  
763 Accessed 31 Oct 2016
- 764 White M, Smith A, Humphryes K, et al (2010) Blue space: the importance of water for preference, affect, and  
765 restorativeness ratings of natural and built scenes. *J Environ Psychol* 30:482–493. doi:  
766 10.1016/j.jenvp.2010.04.004

767 Winemiller KO, McIntyre PB, Castello L, et al (2016) Balancing hydropower and biodiversity in the Amazon,  
768 Congo, and Mekong. *Science* (80- ) 351:128–129

769 Wolter C (2015) Historic catches, abundance, and decline of Atlantic salmon *Salmo salar* in the River Elbe.  
770 *Aquat Sci* 77:367–380. doi: 10.1007/s00027-014-0372-5

771 WWF World Wide Fund for Nature (2001) The status of wild Atlantic salmon.  
772 <http://d2ouvy59p0dg6k.cloudfront.net/downloads/salmon2.pdf%0A>. Accessed 7 Dec 2016

773 Zarfl C, Lumsdon AE, Berlekamp J, et al (2015) A global boom in hydropower dam construction. *Aquat Sci*  
774 77:161–170. doi: 10.1007/s00027-014-0377-0

775

#### 776 **Table titles**

777 Table 1. Attributes and design levels used in the choice experiment.

778 Table 2. Names of the attributes used in the choice experiment and introductory explanations as presented to the  
779 respondents.

780 Table 3. Description of policy scenarios for six alternative river basin management plans.

781 Table 4. Key characteristics of the samples (%).

782 Table 5. Perceived status quo of the rivers within a 50-km area around respondents' homes: means (M), standard  
783 deviations (SD) and ANOVA for river attributes used in the choice experiment.

784 Table 6. Estimated model coefficients and standard deviations (SD) for attributes and attribute levels used in the  
785 choice experiment ( $z$  values in parentheses).

786 Table 7. Marginal willingness-to-pay (MWTP) estimates (€/ year) by country for attributes and attribute levels.

787 Table 8. Compensating surplus (CS) in €/per year for six policy scenarios.

788

#### 789 **Figure caption**

790 Fig. 1. Example of a choice set as shown to respondents.

791

792

793

794

795

796

797

798 Table 1. Attributes and design levels used in the choice experiment.

| Attribute                                                                                                     | Design level | Level description as presented to the respondents                  |
|---------------------------------------------------------------------------------------------------------------|--------------|--------------------------------------------------------------------|
| 1. Fish species that occurs or may occur in the river                                                         | 0            | Bream                                                              |
|                                                                                                               | 1            | Brook trout                                                        |
|                                                                                                               | 2            | Rainbow trout                                                      |
|                                                                                                               | 3            | Atlantic salmon                                                    |
|                                                                                                               | 4            | Brown trout                                                        |
|                                                                                                               | 5            | European eel                                                       |
|                                                                                                               | 6            | Sturgeon                                                           |
|                                                                                                               | 7            | Grayling                                                           |
| 2. Share of individual fish (%) of the displayed species of all fish in the river                             | 0            | currently not occurring (any more) (0 %)                           |
|                                                                                                               | 1            | very rarely occurring (1 %)                                        |
|                                                                                                               | 10           | rarely occurring (10 %)                                            |
|                                                                                                               | 30           | frequently occurring (30 %)                                        |
|                                                                                                               | 50           | very frequently occurring (50 %)                                   |
|                                                                                                               | 70           | nearly exclusively occurring (70 %)                                |
| 3. Share of native animal and plant species of the river (including on the banks) of all species of the river | 10           | very low (10 %)                                                    |
|                                                                                                               | 40           | low (40 %)                                                         |
|                                                                                                               | 70           | high (70 %)                                                        |
|                                                                                                               | 100          | very high (100 %)                                                  |
| 4. Modification of the water flow due to hydropower dams                                                      | 0            | free flowing / no hydropower dams                                  |
|                                                                                                               | -1           | long river segments free flowing / few hydropower dams             |
|                                                                                                               | -2           | short river segments free flowing / many hydropower dams           |
|                                                                                                               | -3           | hardly any river segments free flowing / very many hydropower dams |
| 5. Accessibility of the river banks for humans                                                                | 0            | very difficult                                                     |
|                                                                                                               | 1            | difficult                                                          |
|                                                                                                               | 2            | easy                                                               |
|                                                                                                               | 3            | very easy                                                          |
| 6. Bathing water quality                                                                                      | 0            | poor                                                               |
|                                                                                                               | 1            | moderate                                                           |
|                                                                                                               | 2            | good                                                               |
|                                                                                                               | 3            | very good                                                          |

|                                                      |     |                                     |
|------------------------------------------------------|-----|-------------------------------------|
| 7. Contribution to a river development               | 20  | 20 Euro (= 200 Euro in 10 years)    |
| fund which the respondent would have                 | 50  | 50 Euro (= 500 Euro in 10 years)    |
| to pay every year over a 10-year period <sup>a</sup> | 90  | 90 Euro (= 900 Euro in 10 years)    |
|                                                      | 130 | 130 Euro (= 1,300 Euro in 10 years) |
|                                                      | 180 | 180 Euro (= 1,800 Euro in 10 years) |
|                                                      | 220 | 220 Euro (= 2,200 Euro in 10 years) |

799 *Note.* <sup>a</sup>Contributions were identical in Germany and France (Euros); in Sweden Euros were converted into SEK:  
800 20 Euros = “190 SEK (= 1900 SEK på 10 år)”; 50 Euros = “480 SEK (= 4800 SEK på 10 år); 90 Euros = “860  
801 SEK (= 8600 SEK på 10 år)”; 130 Euros = “1240 SEK (= 12400 SEK på 10 år)”; 180 Euros = “1720 SEK (=   
802 17200 SEK på 10 år)”; 220 Euros = “2100 SEK (= 21000 SEK på 10 år)”; in Norway Euros were converted into  
803 kroner: 20 Euros = “190 kroner per år (=1900 kroner i løpet av 10 år)”; 50 Euros = “470 kroner per år (=4700  
804 kroner i løpet av 10 år)”; 90 Euros = “850 kroner per år (=8500 kroner i løpet av 10 år)”; 130 Euros = “1220  
805 kroner per år (=12200 kroner i løpet av 10 år)”; 180 Euros = “1690 kroner per år (=16900 kroner i løpet av 10  
806 år)”; 220 Euros = “2070 kroner per år (=20700 kroner i løpet av 10 år)”.

807

808

809

810

811

812

813

814

815

816

817

818

819

820

821

822

823

824

825 Table 2. Names of the attributes used in the choice experiment and introductory explanations as presented to the  
826 respondents.

| Short attribute name <sup>a</sup>                                                   | Long attribute name <sup>b</sup>                                                                              | Attribute explanation given in the introduction of the respondents to the DCE <sup>c</sup>                                                                                                                                                                                                                                                              |
|-------------------------------------------------------------------------------------|---------------------------------------------------------------------------------------------------------------|---------------------------------------------------------------------------------------------------------------------------------------------------------------------------------------------------------------------------------------------------------------------------------------------------------------------------------------------------------|
| 1. Fish species                                                                     | 1. Fish species that occurs or may occur in the river                                                         | Shows one of the fish species that, among others, occurs or may occur in the river. Some of the species are currently extinct and could be reintroduced through the release of hatchery-bred fishes (stocking).                                                                                                                                         |
| 2. Share of individual fish of this species of all fish                             | 2. Share of individual fish (%) of the displayed species of all fish in the river                             | This is the relative frequency of the number of individuals of the fish species shown in relation to all individuals of all fish species in the river. A share of 0 % indicates that the species shown currently does not occur in the river (any more) and that it cannot be re-established given the river conditions shown.                          |
| 3. Share of native animal and plant species of all species of the river             | 3. Share of native animal and plant species of the river (including on the banks) of all species of the river | This is the percentage of animals and plant species, including fish species, that are native to the river and its banks in relation to all species in the river. Native species have naturally colonized the river in the past without any human assistance.                                                                                            |
| 4. Usage by hydropower plants                                                       | 4. Modification of the water flow due to hydropower dams                                                      | Hydroelectric plants supply climate friendly electricity. They need dams which impound the water. Some fish species need free-flowing water to be able to migrate through a river to reach their spawning grounds. Dams and other transversal structures hamper these migrations or may even block them entirely, which may lead to species extinction. |
| 5. Accessibility                                                                    | 5. Accessibility of the river banks for humans                                                                | The easier the access, the more of the river's shoreline can be walked on. River banks providing easy access for humans can result in the loss of natural habitats for plants and animals due to artificial embankments or effects of trampling.                                                                                                        |
| 6. Bathing water quality                                                            | 6. Bathing water quality                                                                                      | Poor: turbid water, in summer occasional large area algal blooms, not suitable for swimming<br>Moderate: slightly turbid water, in summer occasional algal blooms, limited suitability for swimming<br>Good: largely clear water, suitable for swimming<br>Very good: very clear water, very suitable for swimming                                      |
| 7. Contribution to a river development fund that you would have to pay for 10 years | 7. Contribution to a river development fund which you would have to pay every year over a 10-year period ...  | ... to achieve the described river status for most rivers within 50 km from your residence. Note that the money that you would have to pay for a river development program would not be available for other expenditures any more.                                                                                                                      |

827 <sup>a</sup>Displayed on the choice sets (Fig. 1). <sup>b</sup>Used to introduce respondents to the choice experiment. <sup>c</sup>Explanations

828 made available on each choice set via the info button next to the attribute's short name (Fig. 1).

829

830

831

832

833

834 Table 3. Description of policy scenarios for six alternative river basin management plans.

|                                                                               | Managerial orientation                                             |                                                                      |                                                                               |                                                                 |                                                                                |                                                                                             |
|-------------------------------------------------------------------------------|--------------------------------------------------------------------|----------------------------------------------------------------------|-------------------------------------------------------------------------------|-----------------------------------------------------------------|--------------------------------------------------------------------------------|---------------------------------------------------------------------------------------------|
|                                                                               | Scenario 1<br>Fisheries<br>focusing on<br>native<br>salmonids      | Scenario 2<br>Fisheries<br>focusing on<br>nonnative<br>salmonids     | Scenario 3<br>Conservation-<br>oriented<br>focusing on<br>native<br>salmonids | Scenario 4<br>Focusing on<br>holistic ecosystem<br>conservation | Scenario 5<br>Hydropower<br>(Green Energy)                                     | Scenario 6<br>Hydropower (Green<br>Energy) and<br>fisheries focusing on<br>native salmonids |
| Attribute                                                                     | Attribute levels                                                   |                                                                      |                                                                               |                                                                 |                                                                                |                                                                                             |
| 1. Fish species                                                               | Atlantic salmon                                                    | Rainbow trout                                                        | Atlantic salmon                                                               | Atlantic salmon                                                 | Bream                                                                          | Brown trout                                                                                 |
| 2. Share of individual fish of<br>the displayed species of all<br>fish        | very frequently<br>occurring (50<br>%)                             | frequently<br>occurring (30<br>%)                                    | frequently<br>occurring (30<br>%)                                             | rarely occurring<br>(10 %)                                      | very frequently<br>occurring (50 %)                                            | frequently occurring<br>(30 %)                                                              |
| 3. Share of native animal and<br>plant species of all species of<br>the river | high (70 %)                                                        | low (40 %)                                                           | very high (100<br>%)                                                          | very high (100 %)                                               | very low (10 %)                                                                | high (70 %)                                                                                 |
| 4. Usage by hydropower<br>plants                                              | long river<br>segments free<br>flowing / few<br>hydropower<br>dams | short river<br>segments free<br>flowing / many<br>hydropower<br>dams | long river<br>segments free<br>flowing / few<br>hydropower<br>dams            | free flowing / no<br>hydropower dams                            | hardly any river<br>segments free<br>flowing / very<br>many hydropower<br>dams | short river segments<br>free flowing / many<br>hydropower dams                              |
| 5. Accessibility                                                              | easy                                                               | very easy                                                            | difficult                                                                     | very difficult                                                  | very easy                                                                      | easy                                                                                        |
| 6. Bathing water quality                                                      | good                                                               | moderate                                                             | good                                                                          | very good                                                       | moderate                                                                       | very good                                                                                   |

835

836

837

838

839

840

841 Table 4. Key characteristics of the samples (%).

|                              | France | Germany | Norway | Sweden | $\chi^2$ (df) |
|------------------------------|--------|---------|--------|--------|---------------|
| Gender                       |        |         |        |        | 0.5 (3)       |
| female                       | 48.9   | 48.4    | 47.5   | 47.7   |               |
| male                         | 51.1   | 51.6    | 52.5   | 52.3   |               |
| Education level <sup>a</sup> |        |         |        |        | 94.4 (6) *    |
| low (0 – 2)                  | 17.8   | 11.1    | 18.4   | 18.2   |               |
| medium (3 or 4)              | 45.6   | 59.0    | 38.6   | 44.1   |               |
| high (5 – 8)                 | 36.6   | 29.9    | 43.0   | 37.7   |               |

842 <sup>a</sup>According to the International Classification of Education (ISCED; UNESCO, 2016).

843 \*  $p < .05$ .

844

845

846

847

848

849

850

851

852

853

854 Table 5. Perceived status quo of the rivers within a 50-km area around respondents' homes: means (*M*), standard deviations (*SD*) and ANOVA for river attributes used in the  
 855 choice experiment.  
 856

| River attribute                                                                   | France                                     |           | Germany                                    |           | Norway                                     |           | Sweden                                     |           | ANOVA    |         |
|-----------------------------------------------------------------------------------|--------------------------------------------|-----------|--------------------------------------------|-----------|--------------------------------------------|-----------|--------------------------------------------|-----------|----------|---------|
|                                                                                   | min. <i>n</i> = 647<br>max. <i>n</i> = 831 |           | min. <i>n</i> = 853<br>max. <i>n</i> = 963 |           | min. <i>n</i> = 605<br>max. <i>n</i> = 845 |           | min. <i>n</i> = 626<br>max. <i>n</i> = 873 |           | <i>F</i> | df      |
|                                                                                   | <i>M</i>                                   | <i>SD</i> | <i>M</i>                                   | <i>SD</i> | <i>M</i>                                   | <i>SD</i> | <i>M</i>                                   | <i>SD</i> |          |         |
| Share of native animal and plant species of all species of the river <sup>a</sup> | 2.2 <sub>a</sub>                           | 0.7       | 2.4 <sub>b</sub>                           | 0.6       | 2.7 <sub>c</sub>                           | 0.7       | 2.6 <sub>c</sub>                           | 0.7       | 63.1 *   | 3, 2726 |
| Usage by hydropower plants <sup>b</sup>                                           | 1.7 <sub>a</sub>                           | 0.8       | 1.9 <sub>b</sub>                           | 0.6       | 2.1 <sub>c</sub>                           | 0.9       | 1.9 <sub>b</sub>                           | 0.8       | 33.9 *   | 3, 2922 |
| Accessibility <sup>c</sup>                                                        | 2.8 <sub>a</sub>                           | 0.7       | 2.9 <sub>a</sub>                           | 0.7       | 3.2 <sub>b</sub>                           | 0.6       | 3.2 <sub>b</sub>                           | 0.7       | 84.7 *   | 3, 3489 |
| Bathing water quality <sup>d</sup>                                                | 1.9 <sub>a</sub>                           | 0.8       | 2.4 <sub>b</sub>                           | 0.7       | 2.6 <sub>c</sub>                           | 0.9       | 2.6 <sub>c</sub>                           | 0.8       | 131.3 *  | 3, 3499 |

857 *Note.* Means in each row that share subscripts do not differ significantly ( $p \geq .05$ ; Games-Howell test, Hochberg's GT2 test).

858 <sup>a</sup>Scale from 1 (*very low* [10 %]) to 4 (*very high* [100 %]). <sup>b</sup>Scale from 1 (*free flowing / no hydropower dams*) to 4 (*hardly any river segments free flowing / very many*  
 859 *hydropower dams*). <sup>c</sup>Scale from 1 (*very difficult*) to 4 (*very easy*). <sup>d</sup>Scale from 1 (*poor*) to 4 (*very good*). For descriptors of intermediate scale levels see Table 1.

860 \*  $p < .05$ .

861

862

863

864

865

866

867



868 Table 6. Estimated model coefficients and standard deviations (*SD*) for attributes and attribute levels used in the choice experiment (*z* values in parentheses).

| Attribute / Attribute level / Interaction term                   | France                  |                         | Germany                 |                          | Norway                  |                          | Sweden                  |                         |
|------------------------------------------------------------------|-------------------------|-------------------------|-------------------------|--------------------------|-------------------------|--------------------------|-------------------------|-------------------------|
|                                                                  | <i>Coefficient</i>      | <i>SD</i>               | <i>Coefficient</i>      | <i>SD</i>                | <i>Coefficient</i>      | <i>SD</i>                | <i>Coefficient</i>      | <i>SD</i>               |
| ASCsq                                                            | <b>-2.020</b><br>(5.72) |                         | <b>-2.413</b><br>(5.78) |                          | <b>-1.636</b><br>(5.41) |                          | <b>-1.651</b><br>(4.07) |                         |
| ASCsq × age                                                      | <b>0.010</b><br>(2.15)  |                         | <b>0.014</b><br>(3.22)  |                          | <b>0.029</b><br>(6.55)  |                          | <b>0.015</b><br>(3.52)  |                         |
| ASCsq × gender <sup>a</sup>                                      | <b>0.474</b><br>(3.52)  |                         | <b>-0.358</b><br>(2.71) |                          | -0.071<br>(0.52)        |                          | -0.186<br>(1.41)        |                         |
| ASCsq × medium level of education <sup>b</sup>                   | -0.129<br>(0.69)        |                         | -0.268<br>(1.17)        |                          | <b>-0.442</b><br>(2.26) |                          | 0.282<br>(1.49)         |                         |
| ASCsq × high level of education <sup>b</sup>                     | -0.216<br>(1.14)        |                         | -0.056<br>(0.23)        |                          | -0.114<br>(0.62)        |                          | -0.142<br>(0.71)        |                         |
| ASCsq × degree of urbanization <sup>c</sup>                      | -0.005<br>(0.65)        |                         | -0.008<br>(0.85)        |                          | <b>-0.124</b><br>(3.61) |                          | <b>-0.056</b><br>(2.82) |                         |
| ASCsq × number of rivers <sup>c</sup>                            | -0.036<br>(1.81)        |                         | 0.052<br>(1.96)         |                          | <b>0.062</b><br>(2.89)  |                          | -0.031<br>(1.16)        |                         |
| 1. Fish species                                                  |                         |                         |                         |                          |                         |                          |                         |                         |
| Bream (reference level)                                          | --                      | --                      | --                      | --                       | --                      | --                       | --                      | --                      |
| Brook trout                                                      | 0.088<br>(0.76)         | <b>-1.419</b><br>(7.55) | 0.111<br>(1.05)         | <b>0.899</b><br>(4.14)   | <b>0.557</b><br>(4.14)  | <b>-1.383</b><br>(6.77)  | 0.045<br>(0.37)         | <b>1.371</b><br>(7.07)  |
| Rainbow trout                                                    | <b>0.387</b><br>(3.22)  | -0.377<br>(0.91)        | 0.239<br>(1.94)         | 0.556<br>(1.58)          | <b>0.693</b><br>(4.51)  | <b>1.428</b><br>(6.20)   | <b>0.600</b><br>(4.57)  | <b>0.670</b><br>(2.26)  |
| Atlantic salmon                                                  | <b>0.330</b><br>(2.69)  | -0.073<br>(0.13)        | -0.041<br>(0.33)        | <b>-0.655</b><br>(2.47)  | <b>1.876</b><br>(12.15) | <b>-1.285</b><br>(6.31)  | <b>0.431</b><br>(3.29)  | <b>0.830</b><br>(3.53)  |
| Brown trout                                                      | <b>0.635</b><br>(4.84)  | <b>-1.018</b><br>(5.33) | <b>0.736</b><br>(5.62)  | <b>0.977</b><br>(4.73)   | <b>1.719</b><br>(11.31) | <b>1.202</b><br>(5.65)   | <b>0.857</b><br>(6.47)  | <b>-0.693</b><br>(3.06) |
| European eel                                                     | <b>0.448</b><br>(3.49)  | <b>-0.833</b><br>(3.98) | 0.137<br>(1.04)         | <b>1.111</b><br>(5.67)   | 0.270<br>(1.67)         | <b>1.392</b><br>(5.65)   | <b>0.318</b><br>(2.25)  | <b>1.341</b><br>(6.74)  |
| Sturgeon                                                         | <b>0.307</b><br>(2.59)  | <b>0.672</b><br>(2.93)  | <b>0.363</b><br>(2.93)  | <b>1.032</b><br>(5.61)   | <b>0.445</b><br>(3.17)  | <b>-0.996</b><br>(4.34)  | -0.027<br>(0.20)        | <b>-0.967</b><br>(5.03) |
| Grayling                                                         | 0.071<br>(0.55)         | <b>0.967</b><br>(4.79)  | -0.033<br>(0.24)        | <b>-1.545</b><br>(7.11)  | 0.159<br>(1.05)         | <b>-1.061</b><br>(4.38)  | -0.023<br>(0.15)        | <b>1.657</b><br>(7.78)  |
| 2. Share of individual fish of the displayed species of all fish | 0.002<br>(1.64)         | <b>0.017</b><br>(9.48)  | <b>-0.004</b><br>(2.69) | <b>-0.021</b><br>(11.41) | 0.000<br>(0.08)         | <b>-0.019</b><br>(10.03) | 0.001<br>(0.41)         | <b>-0.018</b><br>(9.60) |
| 3. Share of native animal and plant species of all species       | <b>0.003</b>            | <b>-0.010</b>           | <b>0.005</b>            | <b>0.015</b>             | <b>0.006</b>            | <b>0.013</b>             | <b>0.007</b>            | <b>0.011</b>            |

|                                                                 |               |              |               |              |               |              |               |              |
|-----------------------------------------------------------------|---------------|--------------|---------------|--------------|---------------|--------------|---------------|--------------|
| of the river                                                    | (1.99)        | (3.56)       | (3.70)        | (7.14)       | (4.08)        | (5.69)       | (4.80)        | (4.17)       |
| 4. Usage by hydropower plants                                   | <b>-0.206</b> | <b>0.413</b> | <b>-0.301</b> | <b>0.451</b> | <b>-0.101</b> | <b>0.380</b> | <b>-0.235</b> | <b>0.405</b> |
|                                                                 | (7.85)        | (11.14)      | (10.23)       | (11.73)      | (3.43)        | (8.50)       | (8.06)        | (9.84)       |
| 5. Accessibility                                                | <b>0.107</b>  | <b>0.322</b> | 0.044         | <b>0.293</b> | <b>0.152</b>  | <b>0.339</b> | <b>0.207</b>  | <b>0.371</b> |
|                                                                 | (4.40)        | (8.21)       | (1.79)        | (7.02)       | (5.12)        | (7.29)       | (7.35)        | (8.95)       |
| 6. Bathing water quality                                        | <b>0.178</b>  | <b>0.342</b> | <b>0.240</b>  | <b>0.415</b> | <b>0.261</b>  | <b>0.392</b> | <b>0.342</b>  | <b>0.437</b> |
|                                                                 | (6.75)        | (8.45)       | (8.05)        | (9.64)       | (7.99)        | (8.32)       | (10.48)       | (9.60)       |
| 7. Annual contribution to a river development fund <sup>d</sup> | <b>-4.813</b> | <b>3.489</b> | <b>-5.790</b> | <b>4.171</b> | <b>-4.450</b> | <b>4.578</b> | <b>-5.446</b> | <b>5.283</b> |
|                                                                 | (31.66)       | (17.22)      | (22.06)       | (14.47)      | (24.21)       | (13.86)      | (23.22)       | (12.95)      |
| <i>N</i> (observations)                                         | 22,959        |              | 22,125        |              | 22,257        |              | 21,627        |              |
| <i>AIC</i>                                                      | 11,671.6      |              | 11,602.6      |              | 10,583.5      |              | 10,926.3      |              |
| <i>BIC</i>                                                      | 11,935.9      |              | 11,866.8      |              | 10,847.8      |              | 11,189.7      |              |
| <i>LL</i> (null)                                                | -7,337.8      |              | -7,685.9      |              | -7,188.2      |              | -7,389.8      |              |
| <i>LL</i> (model)                                               | -5,802.3      |              | -5,768.3      |              | -5,258.7      |              | -5,430.2      |              |

869 *Note.* Significant parameter estimates ( $p < .05$ ) are shown in boldface. *M* = mean; *SD* = standard deviation; ASCsq = alternative-specific constant for the status-quo option; *AIC* =

870 Akaike's information criterion; *BIC* = Bayesian information criterion; *LL* = log-likelihood statistic.

871 <sup>a</sup>Reference category = male. <sup>b</sup>Reference category = low level of education (according to the International Classification of Education, ISCED; UNESCO, 2016). <sup>c</sup>Within the 50-

872 km reference area around respondents' homes. <sup>d</sup>Price parameter estimates are the means and standard deviations of the natural logarithm of the price coefficients.

873

874

875

876

877

878

879

880 Table 7. Marginal willingness-to-pay (MWTP) estimates (€/ year) by country for attributes and attribute levels.

| Attribute / Attribute level                                                          | France        |             |             | Germany       |             |             | Norway <sup>a</sup> |             |             | Sweden <sup>a</sup> |             |             |
|--------------------------------------------------------------------------------------|---------------|-------------|-------------|---------------|-------------|-------------|---------------------|-------------|-------------|---------------------|-------------|-------------|
|                                                                                      | MWTP          | 95% CI      |             | MWTP          | 95% CI      |             | MWTP                | 95% CI      |             | MWTP                | 95% CI      |             |
|                                                                                      |               | lower limit | upper limit |               | lower limit | upper limit |                     | lower limit | upper limit |                     | lower limit | upper limit |
| 1. Fish species                                                                      |               |             |             |               |             |             |                     |             |             |                     |             |             |
| Brook trout                                                                          | 10.8          | -17.2       | 38.8        | 36.2          | -33.2       | 105.7       | <b>47.7*</b>        | 20.3        | 75.1        | 10.4                | -45.4       | 66.2        |
| Rainbow trout                                                                        | <b>47.6*</b>  | 15.9        | 79.3        | 78.3          | -9.0        | 165.5       | <b>59.4*</b>        | 27.0        | 91.8        | <b>139.0*</b>       | 54.7        | 223.2       |
| Atlantic salmon                                                                      | <b>40.6*</b>  | 9.1         | 72.2        | -13.5         | -95.1       | 68.0        | <b>160.7*</b>       | 100.6       | 220.8       | <b>100.0*</b>       | 26.8        | 173.2       |
| Brown trout                                                                          | <b>78.1*</b>  | 39.4        | 116.9       | <b>240.9*</b> | 93.6        | 388.2       | <b>147.2*</b>       | 92.4        | 202.1       | <b>198.7*</b>       | 92.7        | 304.8       |
| European eel                                                                         | <b>55.2*</b>  | 20.0        | 90.4        | 44.9          | -43.6       | 133.5       | 23.1                | -4.9        | 51.1        | <b>73.7*</b>        | 1.2         | 146.2       |
| Sturgeon                                                                             | <b>37.7*</b>  | 6.9         | 68.6        | <b>118.9*</b> | 16.5        | 221.4       | <b>38.2*</b>        | 11.4        | 65.0        | -6.2                | -65.7       | 53.3        |
| Grayling                                                                             | 8.8           | -22.6       | 40.1        | -10.9         | -101.0      | 79.3        | 13.6                | -11.9       | 39.1        | -5.2                | -75.6       | 65.2        |
| Bream                                                                                | -             | -           | -           | -             | -           | -           | -                   | -           | -           | -                   | -           | -           |
| 2. Share of individual fish of the displayed species of all fish <sup>b</sup>        |               |             |             |               |             |             |                     |             |             |                     |             |             |
|                                                                                      | 0.3           | -0.1        | 0.6         | <b>-1.3*</b>  | -2.4        | -0.1        | 0.0                 | -0.2        | 0.3         | 0.1                 | -0.5        | 0.8         |
| 3. Share of native animal and plant species of all species of the river <sup>b</sup> |               |             |             |               |             |             |                     |             |             |                     |             |             |
|                                                                                      | 0.3           | -0.0        | 0.7         | <b>1.7*</b>   | 0.4         | 3.0         | <b>0.5*</b>         | 0.2         | 0.8         | <b>1.5*</b>         | 0.6         | 2.5         |
| 4. Usage by hydropower plants <sup>c</sup>                                           |               |             |             |               |             |             |                     |             |             |                     |             |             |
|                                                                                      | <b>-25.4*</b> | -35.1       | -15.8       | <b>-98.3*</b> | -151.9      | -44.8       | <b>-8.6*</b>        | -14.3       | -2.9        | <b>-54.5*</b>       | -82.7       | -26.3       |
| 5. Accessibility <sup>c</sup>                                                        |               |             |             |               |             |             |                     |             |             |                     |             |             |
|                                                                                      | <b>13.1*</b>  | 6.1         | 20.1        | 14.3          | -3.1        | 31.7        | <b>13.0*</b>        | 6.4         | 19.6        | <b>47.9*</b>        | 22.8        | 73.1        |
| 6. Bathing water quality <sup>c</sup>                                                |               |             |             |               |             |             |                     |             |             |                     |             |             |
|                                                                                      | <b>21.9*</b>  | 12.9        | 30.9        | <b>78.5*</b>  | 33.6        | 123.4       | <b>22.4*</b>        | 12.5        | 32.2        | <b>79.3*</b>        | 40.0        | 118.6       |

881 *Note.* Significant MWTP estimates are shown in boldface. CI = confidence interval.

882 <sup>a</sup>MWTP values in NOK and SEK, respectively, were converted to € <sup>b</sup>Increase in MWTP per % increase. <sup>c</sup>Increase in MWTP for a one-level increase.

883 \*  $p < .05$ .

884

885

886 Table 8. Compensating surplus (CS) in €per year for six policy scenarios.

| Scenario <sup>b</sup>                                                  | France              |             |             | Germany              |             |             | Norway <sup>a</sup>  |             |             | Sweden <sup>a</sup> |             |             |
|------------------------------------------------------------------------|---------------------|-------------|-------------|----------------------|-------------|-------------|----------------------|-------------|-------------|---------------------|-------------|-------------|
|                                                                        | CS                  | 95% CI      |             | CS                   | 95% CI      |             | CS                   | 95% CI      |             | CS                  | 95% CI      |             |
|                                                                        |                     | lower limit | upper limit |                      | lower limit | upper limit |                      | lower limit | upper limit |                     | lower limit | upper limit |
| Fisheries native salmonids<br>Scenario 1                               | 197.5* <sub>a</sub> | 125.4       | 269.6       | 425.9* <sub>bc</sub> | 175.6       | 676.1       | 284.2* <sub>ab</sub> | 178.5       | 389.9       | 578.7* <sub>c</sub> | 303.0       | 854.4       |
| Fisheries nonnative salmonids<br>Scenario 2                            | 155.2* <sub>a</sub> | 96.8        | 213.7       | 328.8* <sub>bd</sub> | 130.3       | 527.4       | 149.7* <sub>ac</sub> | 88.4        | 211.0       | 482.6* <sub>d</sub> | 252.4       | 712.8       |
| Conservation native salmonids<br>Scenario 3                            | 189.0* <sub>a</sub> | 117.9       | 260.2       | 488.2* <sub>bc</sub> | 206.6       | 769.8       | 285.9* <sub>ab</sub> | 179.2       | 392.6       | 574.6* <sub>c</sub> | 299.8       | 849.4       |
| Holistic Ecosystem Conservation<br>Scenario 4                          | 218.1* <sub>a</sub> | 139.3       | 296.9       | 675.9* <sub>bd</sub> | 303.3       | 1048.6      | 303.7* <sub>ac</sub> | 190.3       | 417.0       | 657.8* <sub>d</sub> | 344.4       | 971.3       |
| Hydropower (Green Energy)<br>Scenario 5                                | 77.6* <sub>a</sub>  | 43.4        | 111.8       | 75.6 <sub>a</sub>    | -6.6        | 157.8       | 67.0* <sub>a</sub>   | 35.2        | 98.8        | 245.4* <sub>b</sub> | 122.2       | 368.5       |
| Hydropower (Green Energy) and fisheries native salmonids<br>Scenario 6 | 226.4* <sub>a</sub> | 147.0       | 305.7       | 685.6* <sub>bd</sub> | 311.2       | 1060.0      | 284.3* <sub>ac</sub> | 179.2       | 389.3       | 699.6* <sub>d</sub> | 371.1       | 1028.1      |

887 *Note.* CI = confidence interval. CS estimates in each row that share subscripts do not differ significantly ( $p \geq .05$ ; Poe test).

888 <sup>a</sup>NOK and SEK were converted to € <sup>b</sup>For scenario descriptions see Table 3.

889 \*  $p < .05$ .

890

891

892

893

894

895 Fig. 1

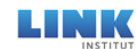

Which of these outcomes for most rivers within a distance of 50 km from your home would you personally prefer as the result of a 10-year river development program?

Mark your answer in the bottom line. Single answer only.

|                                                                                                  | River development program A                              | River development program B                            | Option C (Maintaining the current status of the rivers) |
|--------------------------------------------------------------------------------------------------|----------------------------------------------------------|--------------------------------------------------------|---------------------------------------------------------|
| Fish species ⓘ                                                                                   | Rainbow trout                                            | Sturgeon                                               |                                                         |
| Share of individual fish of this species of all fish ⓘ                                           | very rarely occurring (1%)                               | nearly exclusively occurring (70%)                     |                                                         |
| Share of <u>native</u> animal and plant species of all species of the river ⓘ                    | high (70%)                                               | very low (10%)                                         |                                                         |
| Usage by hydropower plants ⓘ                                                                     | short river segments free flowing / many hydropower dams | long river segments free flowing / few hydropower dams |                                                         |
| Accessibility ⓘ                                                                                  | difficult                                                | easy                                                   |                                                         |
| Bathing water quality ⓘ                                                                          | poor                                                     | good                                                   |                                                         |
| <u>Contribution</u> to a river development fund that <u>you</u> would have to pay for 10 years ⓘ | 130 Euros (= 1,300 Euros in 10 years)                    | 90 Euros (= 900 Euros in 10 years)                     |                                                         |
| I prefer ...                                                                                     | River development program A                              | River development program B                            | Maintaining the current status of the rivers            |
|                                                                                                  | <input type="checkbox"/>                                 | <input type="checkbox"/>                               | <input type="checkbox"/>                                |

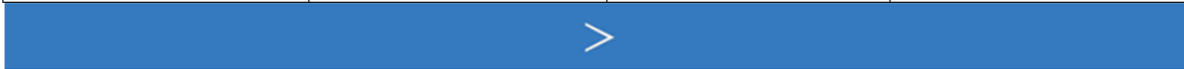

896

897

898
